# Supplementary material
Source: publisher figshare collection journal article supplement (https://sage.figshare.com/ndownloader/files/18514211)
Supplement: Supplementary file 1 [file 18514211]

Supplementary Appendix

Table S1. Drugs incorporated into vasoactive cost calculations and wholesale acquisition cost basis

| Drug           | Presentation<br>Concentration | Presentation<br>Type | WAC Price per<br>Presentation* | WAC Price<br>per Unit |
|----------------|-------------------------------|----------------------|--------------------------------|-----------------------|
| Norepinephrine | 4 mg/mL                       | 1 mL vial            | \$15.13                        | \$3.78/mg             |
| Vasopressin    | 20 units/mL                   | 1 mL vial            | \$96.80                        | \$4.84/unit           |
| Phenylephrine  | 10 mg/mL                      | 10 mL vial           | \$54.78                        | \$0.55/mg             |
| Epinephrine    | 1 mg/mL                       | 30 mL vial           | \$100.00                       | \$3.33/mg             |
| Dobutamine     | 1 g/250 mL                    | Premixed bag         | \$14.17                        | \$14.17/g             |
| Milrinone      | 20 mg/100 mL                  | Premixed bag         | \$12.08                        | \$0.60/mg             |

\*As of December 1, 2015. WAC, wholesale acquisition cost

Table S2. Aggregate vasoactive agent dispensing

| Drug and units     | Total   | Pre-Guideline | Post-Guideline | Difference |
|--------------------|---------|---------------|----------------|------------|
| Norepinephrine, mg | 99,348  | 47,024        | 52,324         | +5,300     |
| Vasopressin, units | 70,220  | 42,000        | 28,220         | -13,780    |
| Phenylephrine, mg  | 142,180 | 68,330        | 73,850         | +5,520     |
| Epinephrine, mg    | 3,568   | 1,368         | 2,200          | +832       |
| Dobutamine, g      | 214     | 100           | 114            | +14        |
| Milrinone, mg      | 760     | 220           | 540            | +320       |

Table S3. Patient outcomes in the sensitivity analysis (cohort design)

| Outcome                                                            | Total<br>(N=1148)    | Pre-Guideline<br>(n=573) | Post-Guideline<br>(n=575) | Absolute risk or<br>median difference<br>(95% CI) | p <sup>†</sup>    |
|--------------------------------------------------------------------|----------------------|--------------------------|---------------------------|---------------------------------------------------|-------------------|
| ICU mortality                                                      | 490 (42.7)           | 249 (43.5)               | 251 (41.9)                | -1.5%<br>(-7.3% to 4.2%)                          | 0.40 <sup>‡</sup> |
| Hospital mortality                                                 | 528 (46.0)           | 268 (46.8)               | 260 (45.3)                | -1.6%<br>(-7.3% to 4.2%)                          | 0.60              |
| New arrhythmia                                                     | 153 (13.3)           | 74 (12.9)                | 79 (13.7)                 | 0.8%<br>(-3.1% to 4.8%)                           | 0.68              |
| Myocardial injury <sup>§</sup>                                     | 8 (3.2)              | 3 (2.4)                  | 5 (4.1)                   | 1.6%<br>(-2.8% to 6.1%)                           | 0.47              |
| New Stage 2 or 3<br>AKI <sup>¶</sup>                               | 247 (33.4)           | 126 (35.1)               | 121 (31.8)                | -3.3%<br>(-10.1% to 3.5%)                         | 0.34              |
| Initiation of CRRT <sup>††</sup>                                   | 165 (16.3)           | 80 (16.0)                | 85 (16.5)                 | 0.5%<br>(-4.0% to 5.0%)                           | 0.83              |
| SOFA at 72 hours<br>after NE <sup>‡‡</sup>                         | 7 (4, 11)            | 7 (4, 11)                | 7 (4, 11)                 | 0 (-0.7 to 0.7)                                   | 0.55              |
| SOFA change from<br>baseline to 72<br>hours after NE <sup>‡‡</sup> | -3 (-5, 0)           | -2 (-5, 0)               | -3 (-5, -1)               | -1 (-1.7 to -0.3)                                 | 0.03              |
| Time to MAP >65<br>mm Hg, hours                                    | 0.25 (0.25-<br>0.28) | 0.25 (0.25-<br>0.33)     | 0.25 (0.25-0.32)          |                                                   | 0.47              |
| Vasoactive<br>duration, days                                       | 2.1 (0.9, 4.3)       | 2.2 (0.9, 4.3)           | 2.0 (0.9, 4.3)            | -0.2 (-0.6 to 0.1)                                | 0.92              |
| Vasopressin<br>duration, days                                      | 1.3 (0.6, 2.2)       | 1.4 (0.6, 2.4)           | 1.0 (0.5, 1.9)            | -0.4 (-0.6 to -0.2)                               | 0.01              |

|                                           |                   |                   |                |                   |       |
|-------------------------------------------|-------------------|-------------------|----------------|-------------------|-------|
| Total vasoactive<br>WAC, \$ <sup>§§</sup> | 351 (121,<br>847) | 401 (121,<br>915) | 315 (121, 787) | -86 (-159 to -12) | 0.11  |
| Norepinephrine<br>WAC, \$ <sup>§§</sup>   | 182 (121,<br>424) | 182 (61, 363)     | 182 (121, 424) | 0 (-29 to 29)     | 0.04  |
| Vasopressin WAC,<br>\$ <sup>§</sup>       | 0 (0, 387)        | 97 (0, 484)       | 0 (0, 290)     | -97 (-144 to -50) | <0.01 |

Data presented as n (%), median (IQR), and median (95% CI).

<sup>†</sup>Per Pearson chi-square or Wilcoxon rank-sum, as appropriate. <sup>‡</sup>P-value from multivariable logistic regression analysis for the cohort effect with acute physiology and chronic health evaluation III and sequential organ failure assessment scores retained in the model. Post-guideline group OR 0.90 (95% CI 0.70-1.15). <sup>§</sup>Total N=247, Pre-Guideline n=124, Post-Guideline n=123; <sup>¶</sup>Total N=740, Pre-Guideline n=359, Post-Guideline n=381; <sup>††</sup>Total N=1015, Pre-Guideline n=500, Post-Guideline n=515; <sup>‡‡</sup>Total N=889, Pre-Guideline n=459, Post-Guideline n=430; <sup>§§</sup>Total N=1126, Pre-Guideline n=565, Post-Guideline n=561. AKI, acute kidney injury; CRRT, continuous renal replacement therapy; ICU, intensive care unit; MAP, mean arterial blood pressure; NE, norepinephrine; SOFA, sequential organ failure assessment; WAC, wholesale acquisition cost.

Table S4. Per patient vasoactive agent dispensing in the sensitivity analysis (cohort design)

| Amount of drug dispensed                                            | Total<br>(n=1126 <sup>†</sup> ) | Pre-Guideline<br>(n=565) | Post-Guideline<br>(n=561) | Median Difference<br>(95% CI) | p <sup>‡</sup> |
|---------------------------------------------------------------------|---------------------------------|--------------------------|---------------------------|-------------------------------|----------------|
| Overall                                                             |                                 |                          |                           |                               |                |
| Norepinephrine, mg                                                  | 48 (32, 112)                    | 48 (16, 96)              | 48 (32, 112)              | 0 (-8 to 8)                   | 0.04           |
| Vasopressin, units                                                  | 0 (0, 80)                       | 20 (0, 100)              | 0 (0, 60)                 | -20 (-30 to -10)              | <0.01          |
| Restricted to patients dispensed particular medication <sup>§</sup> |                                 |                          |                           |                               |                |
| Vasopressin, units                                                  | 80 (40, 160)<br>(n=545)         | 100 (60, 160)<br>(n=312) | 60 (40, 140)<br>(n=233)   | -40 (-54 to -26)              | <0.01          |
| Phenylephrine, mg                                                   | 160 (80, 400)<br>(n=325)        | 170 (80, 400)<br>(n=153) | 160 (80, 400)<br>(n=172)  | -10 (-65 to 45)               | 0.28           |
| Epinephrine, mg                                                     | 8 (4, 16)<br>(n=166)            | 4 (4, 20)<br>(n=72)      | 8 (4, 16)<br>(n=94)       | 4 (-0.4 to 8)                 | 0.84           |
| Dobutamine, g                                                       | 1 (1, 2)<br>(n=90)              | 1 (1, 2)<br>(n=48)       | 2 (1, 3)<br>(n=42)        | 1 (-0.3 to 1.7)               | 0.23           |
| Milrinone, mg                                                       | 40 (20, 80)<br>(n=9)            | 30 (20, 40)<br>(n=6)     | 140 (40, 360)<br>(n=3)    | 110 (-164 to 384)             | 0.06           |

<sup>†</sup>22 patients did not have one or more vasoactive medications dispensed despite documentation of administration, therefore were excluded from the dispensing and cost analysis. <sup>‡</sup>Per Wilcoxon rank-sum test. <sup>§</sup>Reflects all vasoactive medication dispenses that were not returned to the pharmacy. Because patients rarely may have had the medication dispensed and not returned but not documented as administered (i.e., wasted) the number of patients in each group slightly exceeds the number of patients administered the medication. Each patient received norepinephrine, therefore overall dispensing reflects dispensing restricted to patients dispensed norepinephrine. Data presented as median (IQR).

Table S5. Processes of care and outcomes in the exploratory “per-protocol” analysis

|                                                                               | Pre-Guideline<br>(n=309) | Post-Guideline<br>(n=396) | Absolute risk difference or<br>Median difference (95% CI) | p <sup>†</sup> |
|-------------------------------------------------------------------------------|--------------------------|---------------------------|-----------------------------------------------------------|----------------|
| Processes of Care                                                             |                          |                           |                                                           |                |
| Started on AVP                                                                | 133 (43.0)               | 89 (22.5)                 | -20.6% (-27.5% to -14.7%)                                 | <0.01          |
| NE dose at AVP start,<br>mcg/min <sup>‡</sup>                                 | 15 (8, 20)               | 60 (50, 70)               | 45 (41 to 49)                                             | <0.01          |
| AVP replenishment bag<br>requested <sup>‡</sup>                               | 121 (91.0)               | 73 (82.0)                 | -9.0% (-18.3% to 0.0%)                                    | 0.05           |
| NE dose when last AVP<br>replenishment bag<br>requested, mcg/min <sup>§</sup> | 8 (1, 22)                | 50 (17, 50)               | 42 (28 to 56)                                             | <0.01          |
| Started on additional<br>catecholamine vasopressor                            | 216 (37.7)               | 209 (36.4)                | -1.3% (-6.9% to 4.2%)                                     | 0.64           |
| Started on corticosteroids                                                    | 244 (42.6)               | 238 (41.4)                | -1.2% (-6.9% to 4.5%)                                     | 0.68           |
| Time to MAP >65 mm Hg,<br>hours <sup>¶</sup>                                  | 0.25 (0.25,<br>0.33)     | 0.25 (0.25,<br>0.33)      |                                                           | 0.59           |
| Outcomes                                                                      |                          |                           |                                                           |                |
| ICU mortality                                                                 | 104 (33.7)               | 124 (31.3)                | -2.3% (-9.3% to 4.6%)                                     | 0.51           |
| New arrhythmia                                                                | 27 (8.7)                 | 46 (11.6)                 | 2.9% (-1.6% to 7.3%)                                      | 0.21           |
| Myocardial injury <sup>††</sup>                                               | 2 (2.4)                  | 2 (2.3)                   | 0.2% (-4.7% to 4.4%)                                      | 0.93           |
| New Stage 2 or 3 AKI <sup>††</sup>                                            | 54 (25.8)                | 74 (27.4)                 | 1.6% (-6.4% to 9.5%)                                      | 0.70           |
| Vasoactive duration, days                                                     | 1.5 (0.6, 3.2)           | 1.8 (0.7, 3.6)            | 0.2 (-0.2 to 0.6)                                         | 0.16           |
| Vasopressin duration, days                                                    | 1.3 (0.4, 2.0)           | 0.8 (0.5, 1.5)            | -0.4 (-0.1 to -0.7)                                       | 0.05           |
| SOFA change from baseline<br>to 72 hours after NE <sup>§§</sup>               | -3 (-5 to -1)            | -3 (-6 to -1)             | 0 (-0.5 to 0.5)                                           | 0.03           |

†Per Pearson chi-square or Wilcoxon rank-sum, as appropriate. ‡Pre-Guideline n=133, Post-Guideline n=89; §Pre-Guideline n=121, Post-Guideline n=73; ¶Presented as median (95% CI); ††Pre-Guideline n=82, Post-Guideline n=89; †††Pre-Guideline n=209, Post-Guideline n=270; §§ Pre-Guideline n=459, Post-Guideline n=430. Data presented as n (%) and median (IQR) unless otherwise specified. AVP = arginine vasopressin. NE = norepinephrine.

Figure S1. Vasopressin guideline for medical intensive care unit patients with septic shock

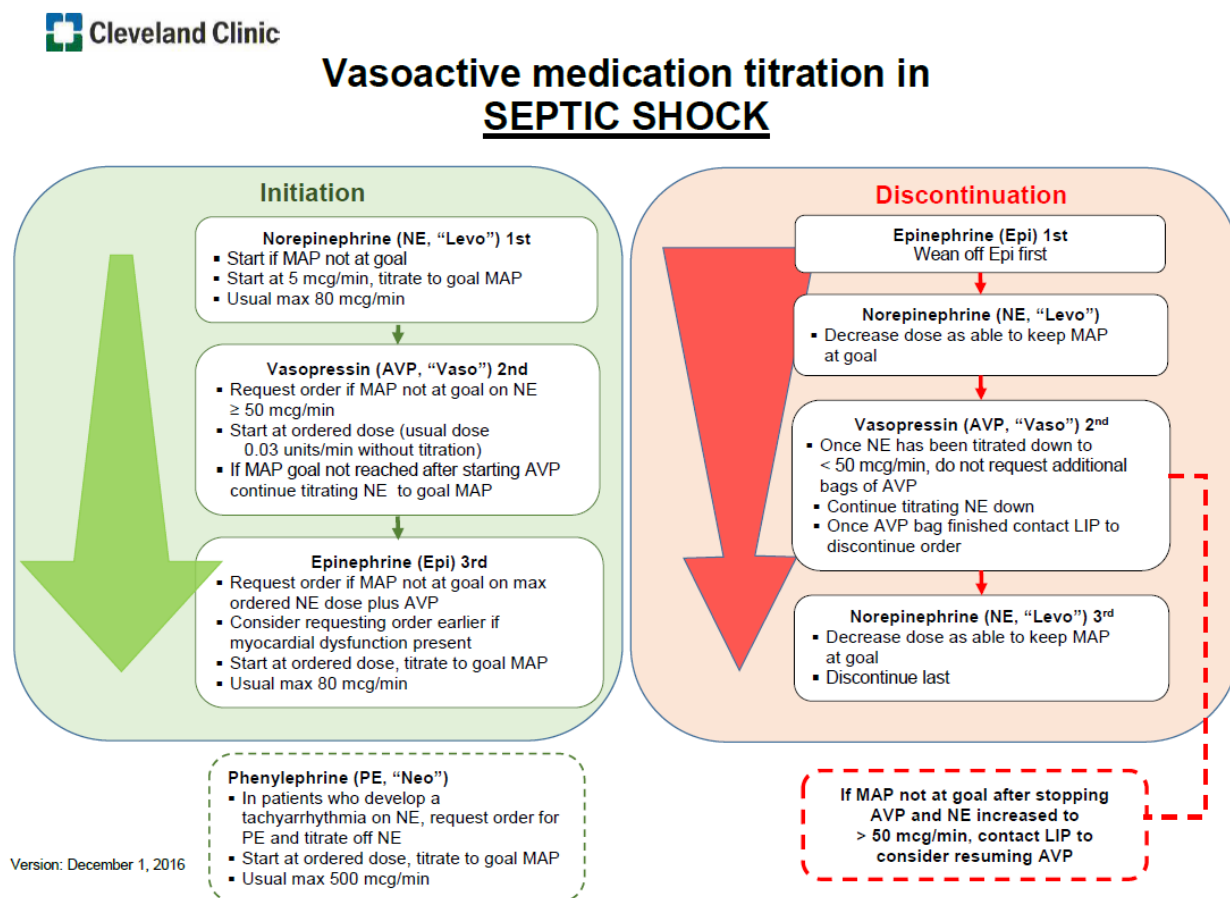

The vasopressin guideline was designed for utilization by bedside nurses with verbiage directed towards their actions. AVP, vasopressin; Epi, epinephrine; LIP, licensed independent practitioner; MAP, mean arterial blood pressure; NE, norepinephrine; PE, phenylephrine.
